# Supplementary material for: Cryopreservation of 13 Commercial Cannabis sativa Genotypes Using In Vitro Nodal Explants
Source: MDPI journal article supplement (doi:10.3390/plants10091794), 2021-08-28
Supplement: s1 [file s1]

**Supplemental Table S1:** Historical major cannabinoid profiles of *C. sativa* strains used in this study.

| Strain    | Historic THC content (%w/w) | Historic CBD content (%w/w) |
|-----------|-----------------------------|-----------------------------|
| Strain 1  | 20-25                       | <0.1                        |
| Strain 2  | 6.8-9.2                     | 7.65-10.4                   |
| Strain 3  | <1                          | 12.6-15.4                   |
| Strain 4  | 17-27                       | <0.1                        |
| Strain 5  | 20-25                       | <0.1                        |
| Strain 6  | 19-24                       | 0.04 to <0.1                |
| Strain 7  | 6-10                        | 6-10                        |
| Strain 8  | 15-25                       | <0.1                        |
| Strain 9  | 8                           | 4.9                         |
| Strain 10 | 22-27                       | 0.04 to <0.1                |
| Strain 11 | 23-28                       | <0.1                        |
| Strain 12 | <0.1                        | 19.8                        |
| Strain 13 | 15-20                       | <0.1                        |
